# Supplementary material for: Fluorescent calix[4]triazole for selective fluoride anion sensing
Source: Royal Society of Chemistry journal article supplement (doi:10.1039/d5ra00014a), 2025-01-01
Supplement: d5ra00014a1.pdf [file d5ra00014a1.pdf]

*Supporting Information*

Fluorescent calix[4]triazole for selective fluoride anion  
sensing

Jihee Cho and Sanghee Kim\*

College of Pharmacy, Seoul National University, Seoul 08826, Republic of Korea

**Contents**

|                                                                        |       |
|------------------------------------------------------------------------|-------|
| 1. <sup>1</sup> H NMR spectrum.....                                    | S1    |
| 2. Complexation studies between <b>Py-CT4</b> and F <sup>-</sup> ..... | S2–S4 |

## 1. $^1\text{H}$ NMR spectrum

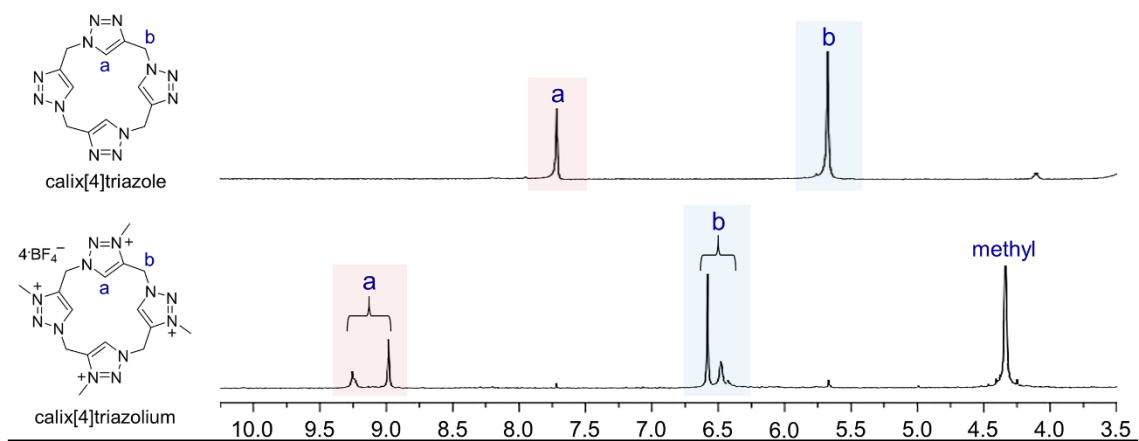

**Fig. S1.**  $^1\text{H}$  NMR spectra of calix[4]triazole and calix[4]triazolium in  $\text{DMSO-}d_6$ .

## 2. Complexation studies between Py-CT4 and F<sup>-</sup>

(1) Association constant calculated by bindfit

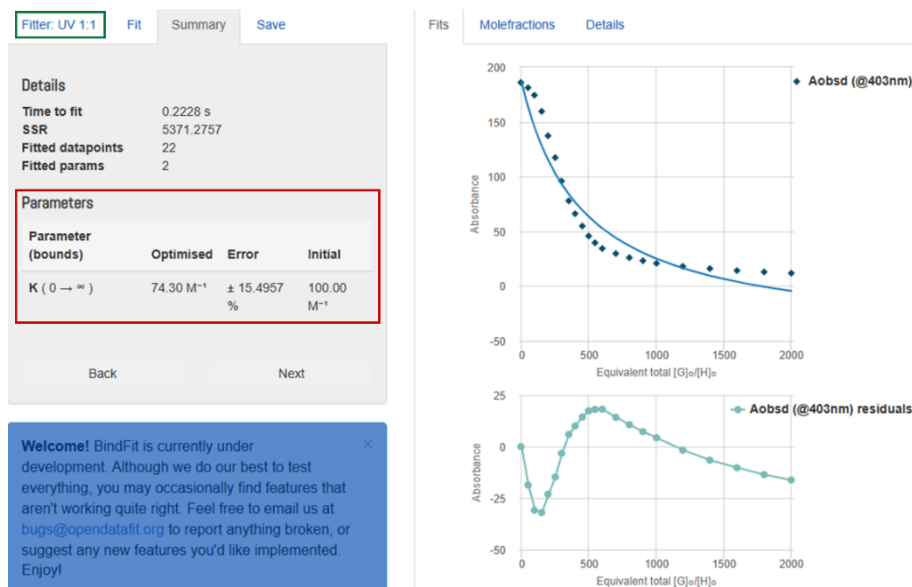

**Fig. S2.** Screenshot of the summary window of <http://app.supramolecular.org/bindfit/>. This screenshot shows the raw data for the fluorescence titration of **Py-CT4** with F<sup>-</sup> with fluorescence emissions at 403 nm vs. the data fitted to a 1:1 UV binding model and the corresponding residual plot and association constants with the calculated asymptotic standard errors.

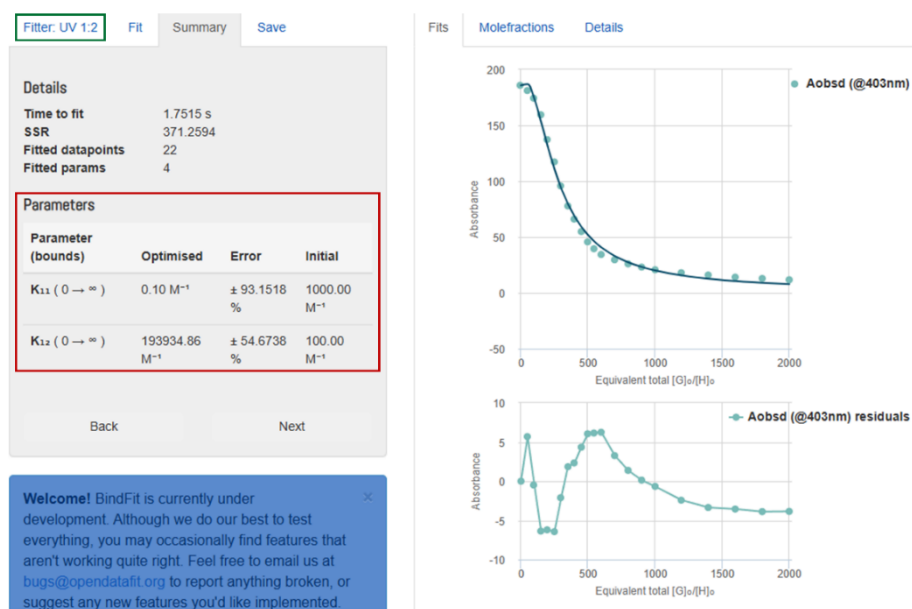

**Fig. S3.** Screenshot of the summary window of <http://app.supramolecular.org/bindfit/>. This screenshot shows the raw data for the fluorescence titration of **Py-CT4** with F<sup>-</sup> with fluorescence emissions at 403 nm vs. the data fitted to a 1:2 UV binding model and the corresponding residual plot and association constants with the calculated asymptotic standard errors.

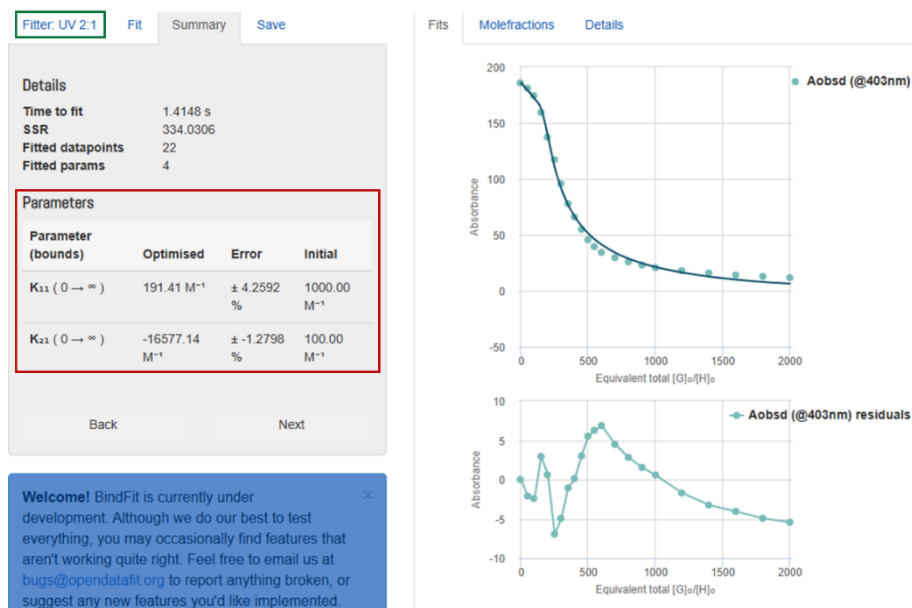

**Fig. S4.** Screenshot of the summary window of <http://app.supramolecular.org/bindfit/>. This screenshot shows the raw data for the fluorescence titration of **Py-CT4** with F<sup>-</sup> with fluorescence emissions at 403 nm vs. the data fitted to a 2:1 UV binding model and the corresponding residual plot and association constants with the calculated asymptotic standard errors.

**Table S1.** Summary of association constants between **Py-CT4** and F<sup>-</sup> according to different binding models.<sup>a</sup>

| Binding models  |                                                         |                                                          |
|-----------------|---------------------------------------------------------|----------------------------------------------------------|
| 1:1             | 1:2                                                     | 2:1                                                      |
| 74.30 (±15.50%) | $K_{11}$ 0.10 (±93.15%)<br>$K_{12}$ 193934.86 (±54.67%) | $K_{11}$ 191.41 (±4.26%)<br>$K_{21}$ -16577.14 (±-1.28%) |

<sup>a</sup> Bindfit software from *supramolecular.org* was used for data analysis.

(2) Job's plot for determining binding stoichiometric ratio

**Experiment details.** Stock solutions with equal concentrations of **Py-CT4** (10  $\mu\text{M}$ ) and  $\text{F}^-$  (10  $\mu\text{M}$ ) in DMSO were prepared. Ten vials were each filled with a 10 mL solution of **Py-CT4** and  $\text{F}^-$  in the following ratios (**Py-CT4**: $\text{F}^-$ ): 10:0, 9:1, 8:2, 7:3, 6:4, 5:5, 4:6, 3:7, 2:8, 1:9. Job's plot was constructed by plotting the change in the fluorescence at 403 nm of **Py-CT4** against the molar fraction of the host.

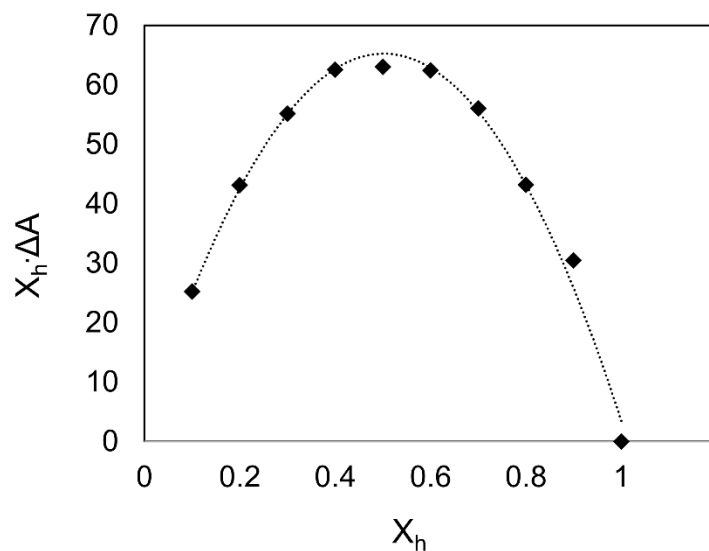

**Fig. S5.** Job's plot generated from the fluorescence titration data of **Py-CT4** with  $\text{F}^-$  in a DMSO solution.
